# Supplementary material for: The hot pick-up technique for batch assembly of van der Waals heterostructures
Source: PubMed Central journal article supplement (PMC4912641; doi:10.1038/ncomms11894), 2016-06-16
Supplement: ncomms11894-s1.pdf [file ncomms11894-s1.pdf]

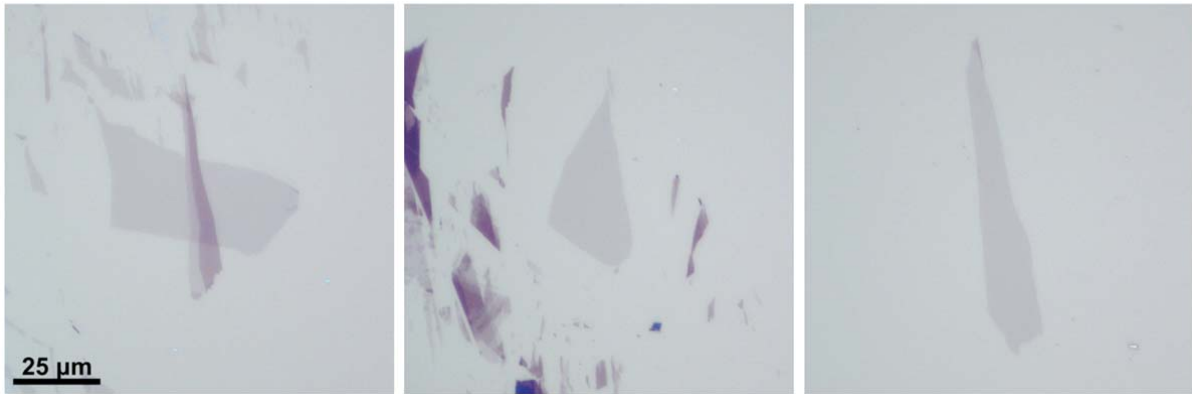

1  
2  
3  
4  
5

**Supplementary Figure 1: Micromechanical cleavage of graphene on oxygen plasma treated Si/SiO<sub>2</sub>.**  
Optical microscopy images of three examples of large single layer graphene flakes cleaved on a single Si/SiO<sub>2</sub> chip after oxygen plasma treatment.

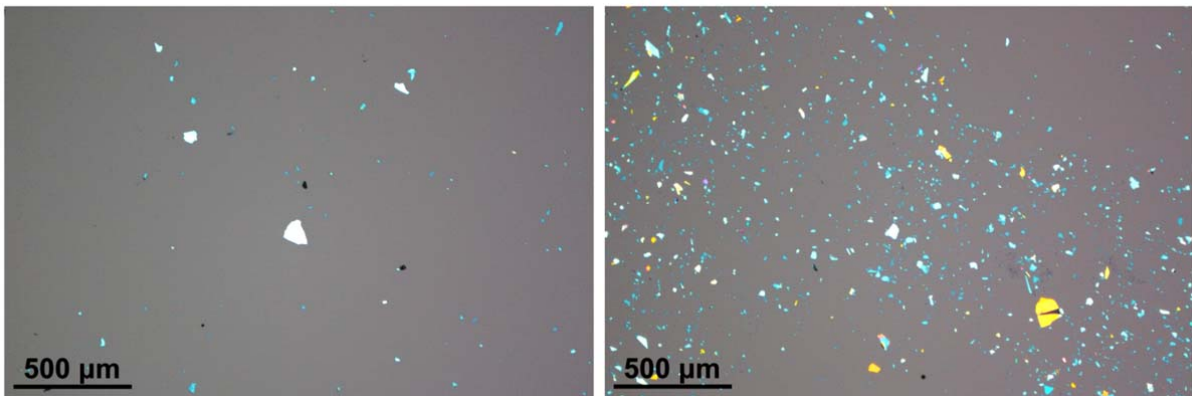

6  
7  
8  
9  
10  
11

**Supplementary Figure 2: Comparison of hBN yield.** Optical images showing the difference in cleaving yield of hBN on pristine (left) and oxygen plasma-treated (right) SiO<sub>2</sub> surfaces, using the same cleaving tape.

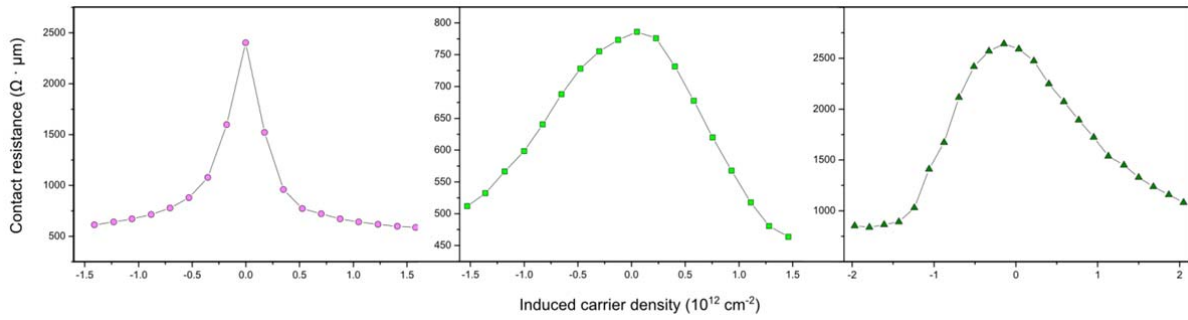

12

13 **Supplementary Figure 3: Contact resistance measurements of encapsulated graphene.** Contact resistance  
 14 measurements from single- (left), bi- (middle) and trilayer (right) graphene devices. The values are  
 15 extracted from the measurements of source-drain current and  $R_{xx}$ .

16

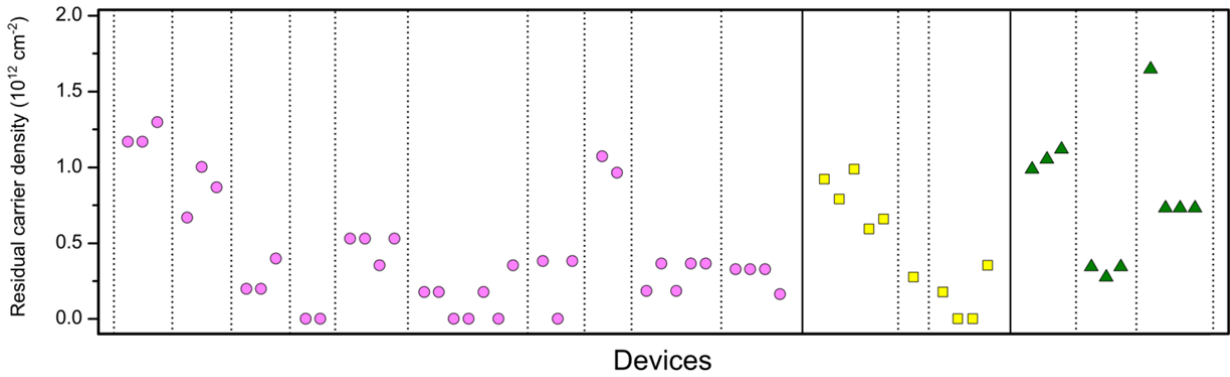

17

18 **Supplementary Figure 4: Doping of encapsulated graphene.** Residual carrier density at zero bias for the  
 19 Hall bar device measurements reported in Figure 6.

20

21

22

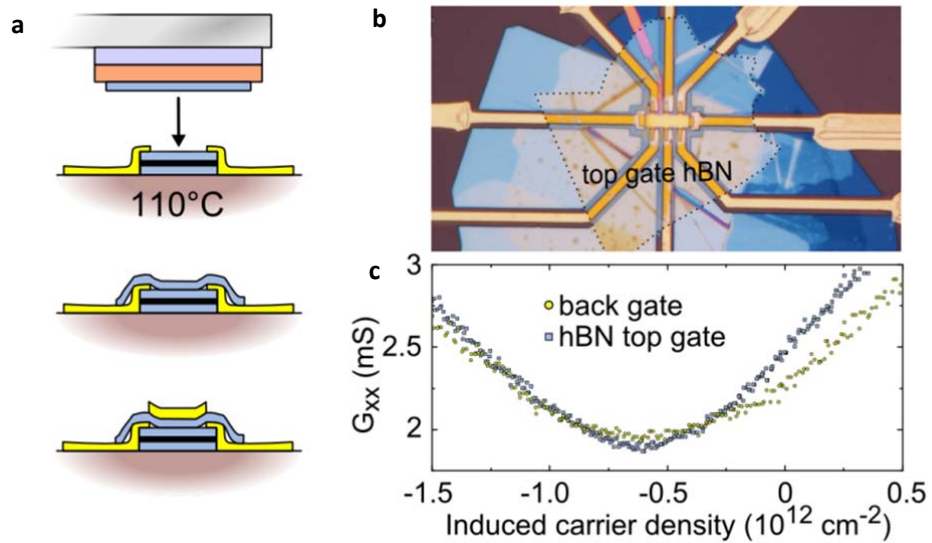

23

24 **Supplementary Figure 5: Top gate addition.** a) Schematic process flow for addition of hBN-insulated top

25 gate. b) Optical image of top gate insulator hBN dropped down onto device after fabrication. c)

26 Conductance vs. gate-induced carrier density for the same device using a Si back gate and a hBN top gate.

27

28

29

30

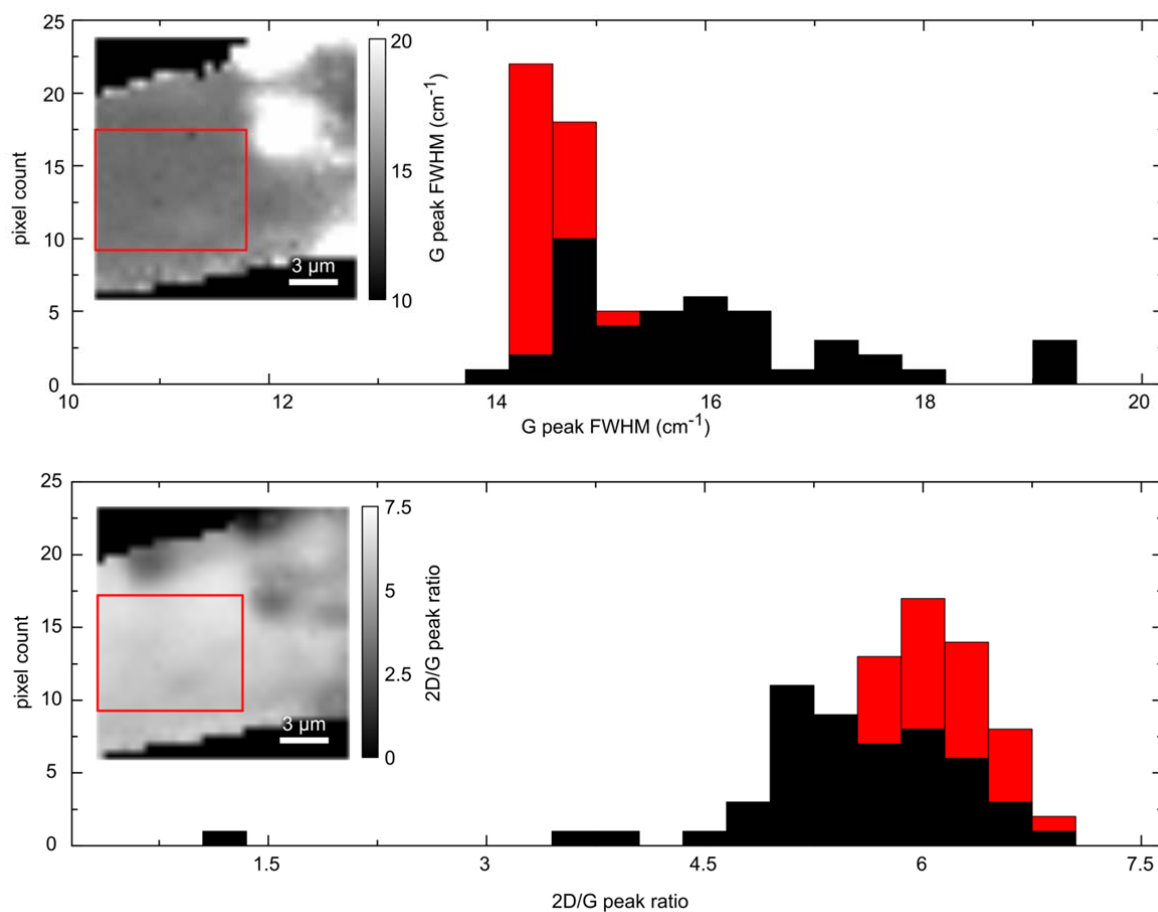

31

32

**Supplementary Figure 6: Homogeneity of Raman characteristics.** Raman maps of hBN encapsulated

33

graphene, taken from the indicated region in Figure 4d inset in the main manuscript. Histograms show pixel

34

counts of the measured parameters, the  $G$  peak full width at half maximum (FWHM) and  $I(2D)/I(G)$  peak

35

intensity ratio. Contributions to the distributions from the boxed regions in the maps are marked in red in

36

the histograms, whilst the black areas of the histograms represent the values outside of the areas marked

37

in red. These regions are specifically chosen to show variation in the Raman properties of encapsulated

38

graphene dependent on the control of the contact front (see Supplementary Movie 5). The drop down

39

techniques used in this study result in large regions of encapsulated graphene with a narrow distribution of

40

$G$  peak FWHM around  $14\text{-}15\text{ cm}^{-1}$  and an  $I(2D)/I(G)$  peak intensity ratio of around 6. These values

41

demonstrate the low residual doping of such samples.

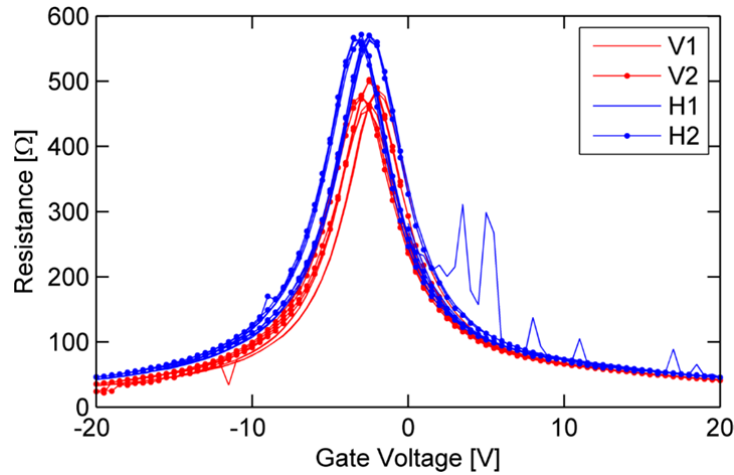

42  
43  
44  
45  
46  
47  
48

**Supplementary Figure 7: van der Pauw measurements of square devices.** Representative gate voltage sweep for a van der Pauw device with 5  $\mu\text{m}$  side length – device #21 in Figure 6a of the main manuscript. Reproducible gate induced changes in the resistance irrespective of the configuration of the contacts (V1, V2, H1, H2) imply that the device is homogeneous and that the reciprocity theorem holds. See Supplementary Methods.

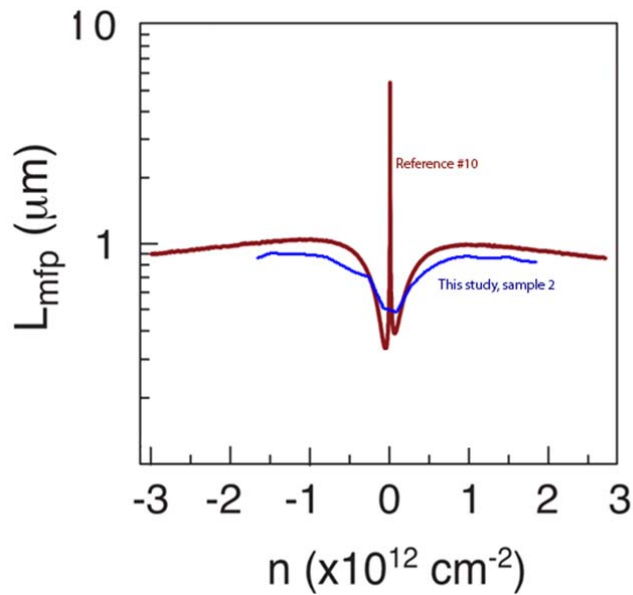

49  
50  
51  
52  
53

**Supplementary Figure 8: Mean free path comparison.** Comparison of mean free path in this study (blue curve) vs. data from reference 10 (main text references) (brown curve) from a 1.9  $\mu\text{m}$  wide Hall bar device – device 2 in Figure 6a of the main manuscript. The figure is adapted from reference 10 (main text references).

54  
55

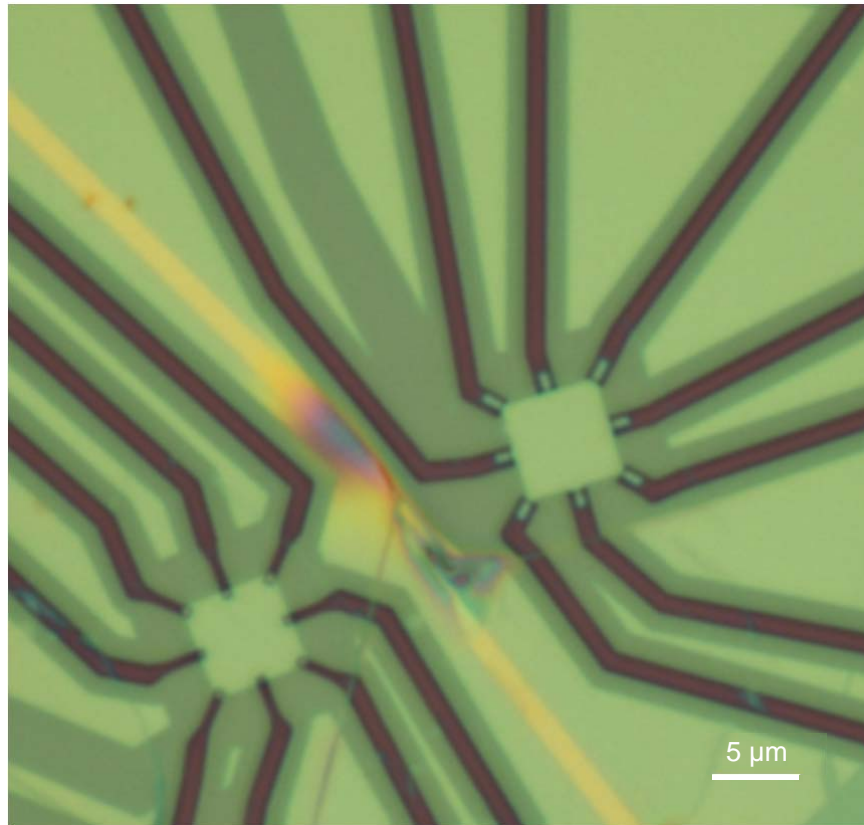

56  
57  
58  
59

**Supplementary Figure 9: Fabrication of van der Pauw devices.** Optical image of two van der Pauw type encapsulated devices before deposition of metal electrodes and lift-off.

60

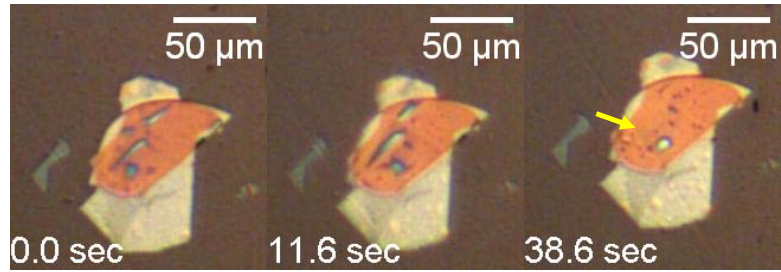

61

62

63 **Supplementary Figure 10: Trapping and migration of blisters in hBN/graphene/hBN.** Optical image of  
64 mobile blisters (indicated by yellow arrow) within an hBN-graphene-hBN heterostructure on SiO<sub>2</sub>  
65 assembled at 40°C and heated to 70°C (selected frames from Supplementary Movie S1).

66

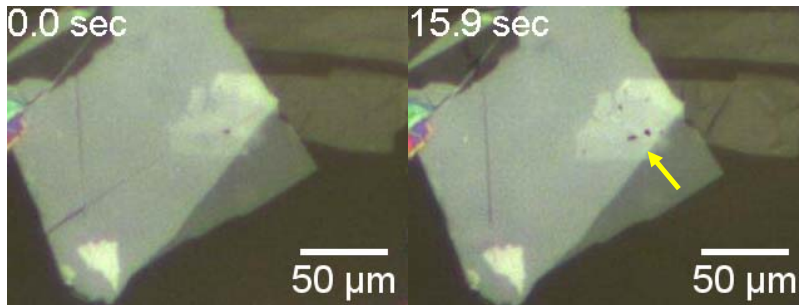

67

68 **Supplementary Figure 11: Trapping and migration of blisters after pick-up.** Optical image of mobile  
69 blisters (indicated by yellow arrow) within an hBN-graphene heterostructure on PPC/PDMS before drop-  
70 down on hBN, assembled at 40°C and heated to 70°C (selected frames from Supplementary Movie 2).

71

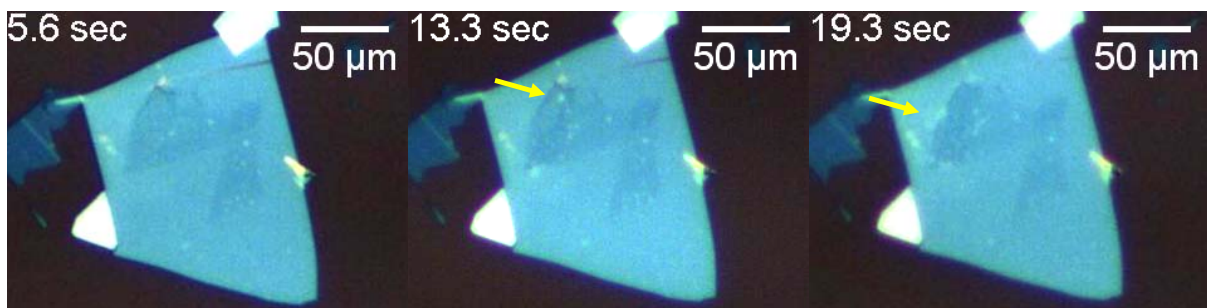

72

73 **Supplementary Figure 12. Trapping and migration of blisters after drop-down.** Optical image of mobile  
74 blisters (indicated by yellow arrow) within an hBN-graphene heterostructure on SiO<sub>2</sub> before pick-up  
75 assembled at 40°C and heated to 70°C (selected frames from Supplementary Movie 3).

76



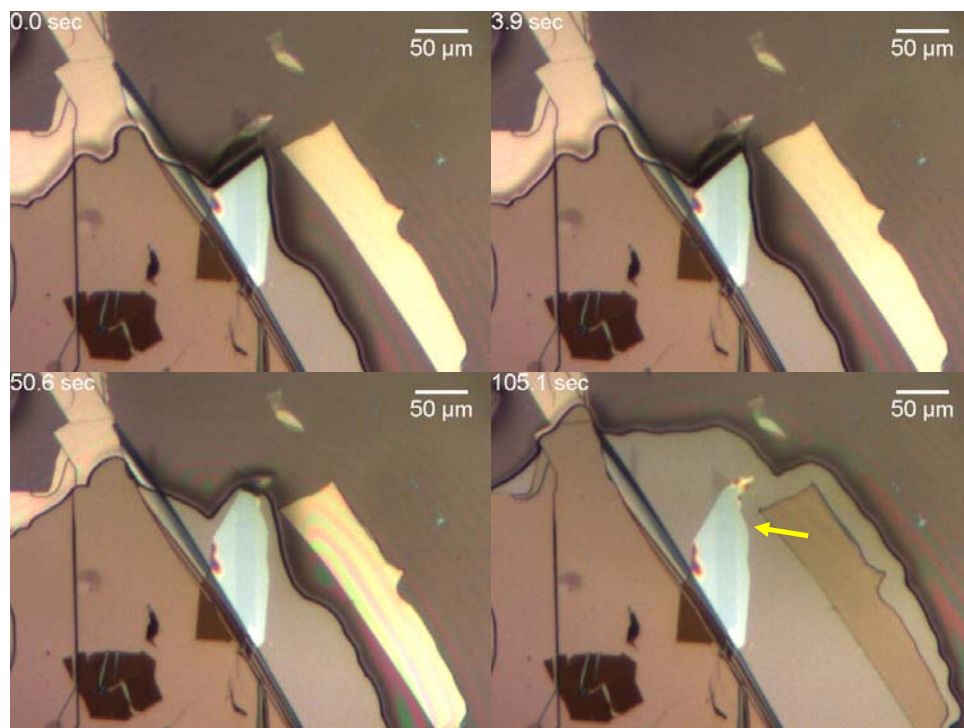

77

78

79 **Supplementary Figure 13: Blister-free drop-down.** Drop-down of an hBN flake adhered to PPC/PDMS onto  
80 a graphene layer on SiO<sub>2</sub>. Control of the contact front forces any contamination between the faces of the  
81 2D materials out of the heterostructure towards the edges (indicated by yellow arrow). Selected frames  
82 from Supplementary Movie 4.



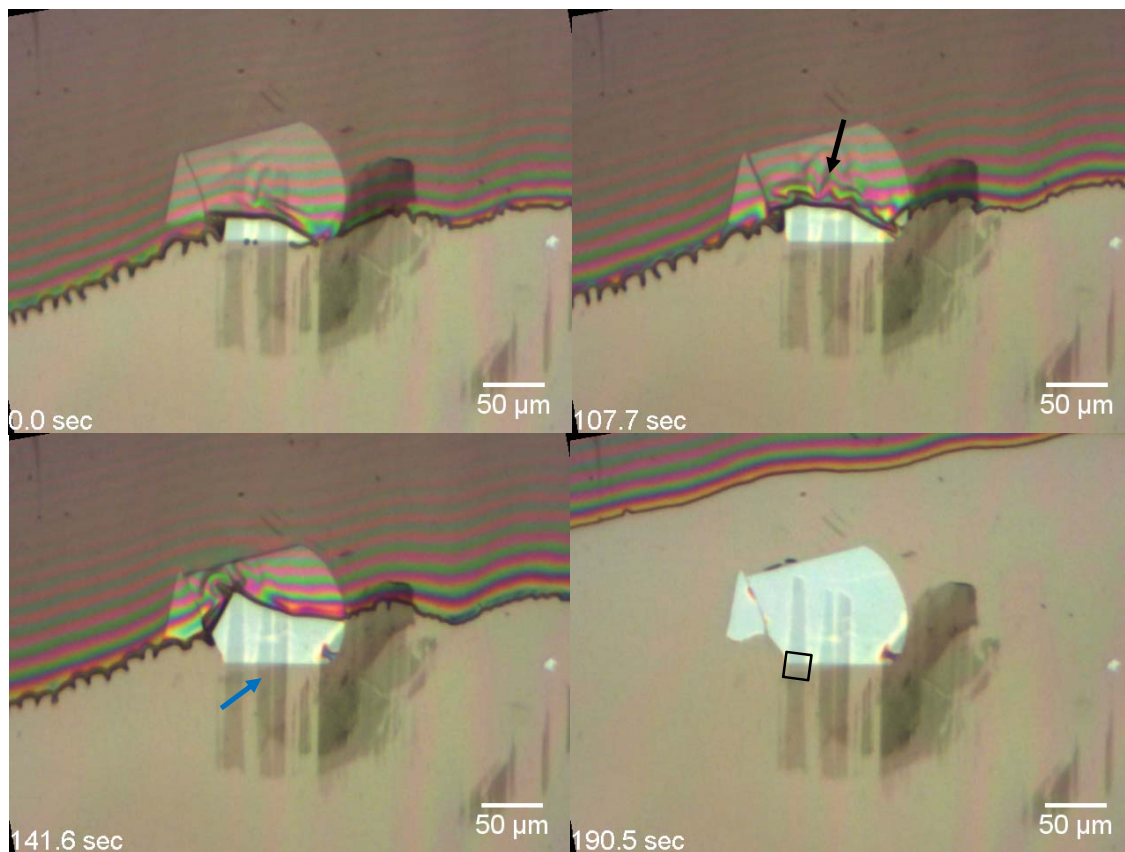

83

84

**Supplementary Figure 14: Blister formation during drop-down.** Drop-down of an hBN flake adhered to PPC/PDMS onto a graphene layer on SiO<sub>2</sub>. In this instance, the contact front is not well controlled (black arrow), resulting in the visible formation of blisters (blue arrow) and inhomogeneous Raman  $I(2D)/I(G)$  and  $G$  peak FWHM values (See Supplementary Figure 6). The boxed region indicates where the data in Supplementary Figure 6 was acquired. Selected frames from Supplementary Movie 5)

90

### 91 **Supplementary Methods**

92 Details of the hot pick-up transfer are described in the following. Step 1: Pick up of the hBN flake from the  
 93 silicon oxide surface. A piece of Si/SiO<sub>2</sub> with exfoliated hBN is placed on a microscope vacuum hot plate  
 94 stage. The glass slide is held in a micromanipulator and kept approximately horizontal above the sample,  
 95 with the polymer facing down. The PDMS/PPC is placed in contact with the hBN flake by lowering the glass  
 96 slide along the z-axis of the micromanipulator. When the polymer completely covers the hBN flake, the  
 97 temperature is raised to 55°C, and then lowered to 40°C. At this temperature, retracting the glass slide  
 98 results in the pick-up of the hBN from the SiO<sub>2</sub> on the PPC (Figure 1 f i). This procedure is repeated for all  
 99 the targeted hBN flakes (one per slide), so that a batch of hBN flakes adhered to glass slides is prepared.

100

101 Step 2: Drop-down of hBN on top of graphene. A Si/SiO<sub>2</sub> substrate with exfoliated graphene flakes is placed  
102 on the heating stage. The temperature is raised to 110 °C. A previously picked-up hBN flake is aligned over  
103 a chosen graphene flake with some separation between the surfaces (Figure 1 f ii). The glass slide is then  
104 lowered until the polymer comes into contact with the oxide surface. By further lowering the glass slide,  
105 the PPC front proceeds until reaching full contact with the SiO<sub>2</sub> surface. In this phase the polymer behaves  
106 as a liquid. It is important to proceed as slow as possible, in order to avoid non-conformal contact between  
107 hBN and graphene. When fully in contact, by moving slowly the glass slide away from the surface, the  
108 polymer front recedes very slowly. In this way it is possible to release the hBN from the PPC onto the  
109 graphene flake, without detaching the PPC from the PDMS block (Figure 1 f iii). The procedure is repeated  
110 until all the graphene flakes are covered by the hBN flakes prepared in 'Step 1'.

111

112 Step 3: baking. In order to promote the adhesion between graphene and hBN, the Si/SiO<sub>2</sub> substrate with  
113 the stacks is baked on a hot plate (in air) at 130 °C for 15 min.

114 Step 4: pick-up of the hBN/G stacks. All the hBN/G stacks are picked up from the SiO<sub>2</sub> surface repeating the  
115 procedure introduced in 'Step 1', one per glass slide (Figure 1 f iv).

116

117 Step 5: drop down of the hBN/G stack on the bottom hBN. Finally, the hBN/G stacks (on PPC) are dropped  
118 down on hBN flakes (cleaved on Si/SiO<sub>2</sub> substrates) similarly to what is done in 'Step 2' (Figure 1 f v-vii). The  
119 bottom hBN flakes are selected using dark field optical microscopy, as tape residues can be easily spotted  
120 and avoided.

121 Resistivity values for van der Pauw devices are measured by applying a constant source-drain bias to two  
122 neighbouring corner contacts of the device and measuring the voltage drop between the opposite contacts  
123 during sweeping of the gate voltage. This permits two pairs (through exchanging the source-drain and  
124 measurement terminals) of independent measurements of the resistance of the device  $R_{vertical}^{1,2}$  and  
125  $R_{horizontal}^{1,2}$  across the orthogonal 'vertical' and 'horizontal' directions (Supplementary Figure 7), and the  
126 pairs are then averaged to produce  $R_{vertical}$  and  $R_{horizontal}$ . The sheet resistance  $R_S$  is calculated by applying the  
127 reciprocal van der Pauw formula  $\exp(-\pi R_{vertical}/R_S) + \exp(-\pi R_{horizontal}/R_S) = 1$ .
